# Supplementary material for: Genetic Diversity of Polymorphic Vaccine Candidate Antigens (Apical Membrane Antigen-1, Merozoite Surface Protein-3, and Erythrocyte Binding Antigen-175) in Plasmodium falciparum Isolates from Western and Central Africa
Source: PubMed Central journal article supplement (PMC3029182; doi:10.4269/ajtmh.2011.10-0365), 2011-02-04
Supplement: SD3.pdf [file SD3.pdf]

The following are supplemental materials and will be published online only

SUPPLEMENTAL TABLE 1  
 Primers and sequences used in the study, Africa\*

| Primer name                                                            | Sequence length 5'→3'        |
|------------------------------------------------------------------------|------------------------------|
| For the first amplification reactions, the following primers were used |                              |
| <i>eba1</i> (forward)                                                  | CAAGAAGCAGTTCCTGAGGAA        |
| <i>eba-2</i> (reverse)                                                 | TCTCAACATTCATATTAACAATTC     |
| <i>msp-3</i> (159F)                                                    | ATGTTGCTAGTAAAGAAATTG        |
| <i>msp-3</i> (745R)                                                    | CATAACTAGAAGCTTCTTTTGC       |
| <i>ama-1</i> (VM785/3)                                                 | CCGGATCCCCTTTGAGTTTACATATATG |
| <i>ama-1</i> (VM990)                                                   | AAATTCTTTCTAGGGCAAAC         |
| For the second amplification reaction, the following primers were used |                              |
| <i>eba-3</i> (forward)                                                 | GAGGAAAACACTGAAAATAGCACAC    |
| <i>eba-4</i> (reverse)                                                 | CAATTCCTCC-AGACTGTTGAACAT    |
| <i>msp-3</i> (188F)                                                    | ATAATCTTAACTTAAGAAATGC       |
| <i>msp-3</i> (745 R)                                                   | CATAACTAGAAGCTTCTTTTGC       |
| <i>ama-1</i> (VM815)                                                   | GGA ACTCAATATAGACTTCC        |
| <i>ama-1</i> (VM990)                                                   | AAATTCTTTCTAGGGCAAAC         |

\**eba* = erythrocyte binding antigen; *msp* = merozoite surface protein; *ama* = apical membrane antigen.
